# Supplementary material for: Variant PRC1 competes with retinoic acid-related signals to repress Meis2 in distal forelimb bud
Source: Oxford University Press journal article supplement (doi:10.1242/dev.166348), 2018-01-01
Supplement: dev166348supp.pdf [file dev166348supp.pdf]

## Supplemental Table S1

| Table S1. Primer information |                                                           |                       |
|------------------------------|-----------------------------------------------------------|-----------------------|
| <b>For genotyping</b>        |                                                           |                       |
|                              |                                                           | 5' ->3'               |
| <i>Pcgf3</i>                 | P1                                                        | ATAAGATGAGATGGGATGGGC |
|                              | P2                                                        | ACGCCTCCAGGTGATCCATAC |
| <i>Pcgf5</i>                 | P1                                                        | TGTTTACAGAGAGGAAGCGCC |
|                              | P2                                                        | TGGCCTTGGTACACATATAGC |
| <b>For CHIP-qPCR</b>         |                                                           |                       |
|                              |                                                           | 5' ->3'               |
| <i>Meis1</i>                 | Previously described in Yakushiji-Kaminatsui et al., 2016 |                       |
| <i>Meis2</i>                 |                                                           |                       |
| <i>Hoxa11</i> promoter       | Forward                                                   | CTCGCACCTTGTACCCTGAT  |
|                              | Reverse                                                   | GATGCCGATTGCGTTTAGTT  |
| <i>Hoxa13</i> promoter       | Forward                                                   | TCCTGGAACCAACAGGAAAC  |
|                              | Reverse                                                   | TGGCATGTTTTAGGGACCTC  |
| <i>Pitx2</i> promoter        | Forward                                                   | ATTTCTCCAGGAGCCATTTG  |
|                              | Reverse                                                   | ACTCTCTGTCGTCGGGAGTC  |

## Supplemental Table S2

| Table S2. Public CHIP-seq datasets used in this research |                  |                                                                                                                                                                                                                             |
|----------------------------------------------------------|------------------|-----------------------------------------------------------------------------------------------------------------------------------------------------------------------------------------------------------------------------|
| Dataset                                                  | Accession number | Reference                                                                                                                                                                                                                   |
| E11.5, forelimb proximal, RING1B                         | GSM1716759       | Yakushiji-Kaminatsui et al., RING1 proteins contribute to early proximal-distal specification of the forelimb bud by restricting <i>Meis2</i> expression, <b>2016</b> Development 143, 276-285.                             |
| E11.5, forelimb distal, RING1B                           | GSM1716760       |                                                                                                                                                                                                                             |
| MV-4-11, Vehicle 1, RARA WCE                             | SRX2705416       | McKeown et al., Superenhancer Analysis Defines Novel Epigenomic Subtypes of Non-APL AML, Including an RARα Dependency Targetable by SY-1425, a Potent and Selective RARα Agonist, <b>2017</b> Cancer Discov. 10, 1136-1153. |
| MV-4-11, Vehicle 2, RARA WCE                             | SRX2705415       |                                                                                                                                                                                                                             |
| MV-4-11, Vehicle 1, RARA IP                              | SRX2705441       |                                                                                                                                                                                                                             |
| MV-4-11, Vehicle 2, RARA IP                              | SRX2705440       |                                                                                                                                                                                                                             |
| MV-4-11, Treated 1, RARA WCE                             | SRX2705418       |                                                                                                                                                                                                                             |
| MV-4-11, Treated 2, RARA WCE                             | SRX2705417       |                                                                                                                                                                                                                             |
| MV-4-11, Treated 1, RARA IP                              | SRX2705443       |                                                                                                                                                                                                                             |
| MV-4-11, Treated 2, RARA IP                              | SRX2705442       |                                                                                                                                                                                                                             |
| MV-4-11, Vehicle 1, H3K27ac WCE                          | SRX2705477       |                                                                                                                                                                                                                             |
| MV-4-11, Vehicle 2, H3K27ac WCE                          | SRX2705476       |                                                                                                                                                                                                                             |
| MV-4-11, Vehicle 3, H3K27ac WCE                          | SRX2705474       |                                                                                                                                                                                                                             |
| MV-4-11, Vehicle 1, H3K27ac IP                           | SRX2705454       |                                                                                                                                                                                                                             |
| MV-4-11, Vehicle 2, H3K27ac IP                           | SRX2705453       |                                                                                                                                                                                                                             |
| MV-4-11, Vehicle 3, H3K27ac IP                           | SRX2705450       |                                                                                                                                                                                                                             |
| MV-4-11, Treated 2, H3K27ac WCE                          | SRX2705478       |                                                                                                                                                                                                                             |
| MV-4-11, Treated 3, H3K27ac WCE                          | SRX2705475       |                                                                                                                                                                                                                             |
| MV-4-11, Treated 2, H3K27ac IP                           | SRX2705455       |                                                                                                                                                                                                                             |
| MV-4-11, Treated 3, H3K27ac IP                           | SRX2705452       |                                                                                                                                                                                                                             |
| MV-4-11, Treated 4, H3K27ac IP                           | SRX2705451       |                                                                                                                                                                                                                             |

## Supplemental Figures

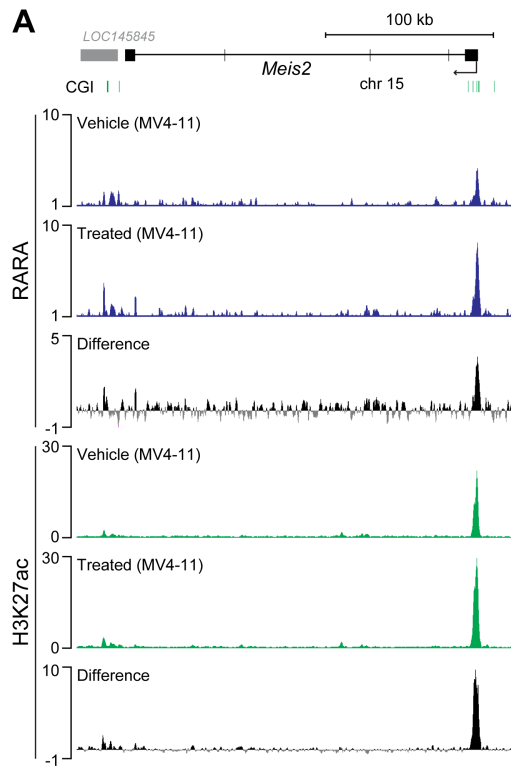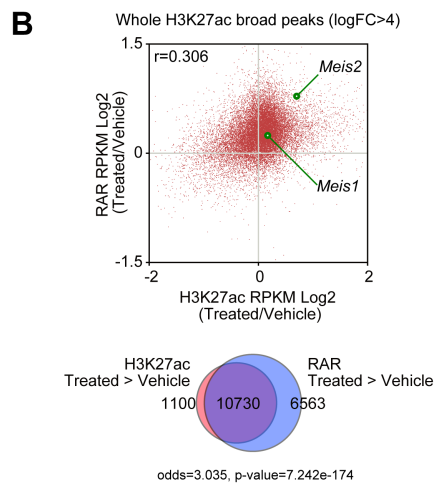

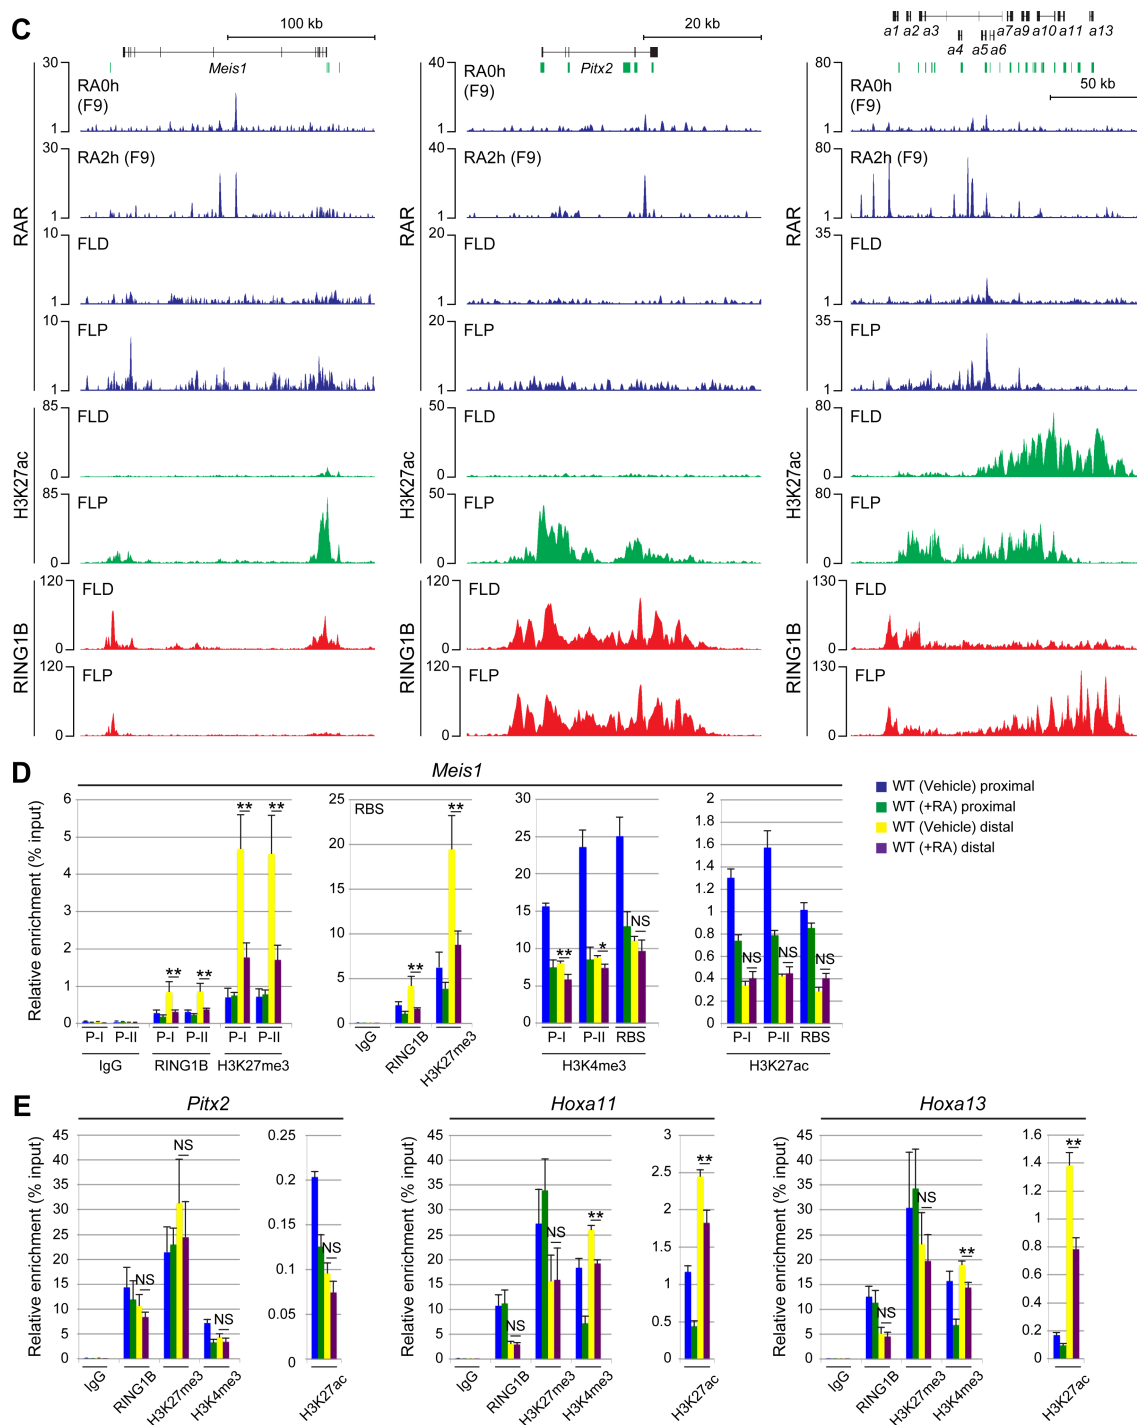

**Fig. S1 (related to Fig. 1). Effects of either SY-1425 (tamibarotene) or ATRA on RAR $\alpha$ , histone modification and RING1B activities in human MV4-11 cells or mouse forelimb buds at E10.5.**

(A) ChIP-seq showing the level of RARA and H3K27ac at *Meis2* locus in MV4-11 cells treated with vehicle or SY-1425, a selective RAR $\alpha$  agonist (treated). The difference in the normalized number of reads between the vehicle- and SY1425-treated is shown by negative (gray) and positive (black), respectively (tracks 3 and 6). (B) Scatter plots representing the logarithmic ratio of normalized read counts between SY-1524 stimulated and vehicle-treated MV4-11 cells (top). The alterations in enrichments of H3K27ac and RAR by SY-1425 treatment showed a positive correlation. Overlaps between peaks of RAR and H3K27ac that had significantly enriched and at least more than 2 times reads as compared with whole cell extract (bottom). (C) Distribution of RAR, H3K27ac and RING1B at the *Meis1* (left), *Pitx2* (middle) and *HoxA* (right) locus in F9 cells (0 hour with only vehicle (RA0h)) and 2 hours after RA stimulation (RA2h), E11.5 proximal (FLP) and distal (FLD) forelimb buds revealed by ChIP-seq analysis. (D, E) ChIP-qPCR analysis showing the levels of RING1B, H3K27me3, H3K4me3 and H3K27ac at the TSS and RBS of the *Meis1* (D) and the promoters of *Hoxa11*, *Hoxa13* and *Pitx2* (E) in the proximal and distal regions of E10.5 forelimb buds from wild type (vehicle) and ATRA-treated wild type (+RA) embryos. Error bars indicate s.e.m. of two or three biological replicates. \*\*P<0.01, \*P<0.05, NS>0.05, Student's *t*-test. Enrichment of ChIP-seq (*Y*-axis) in (A) and (C) is shown as the normalized depth of coverage.

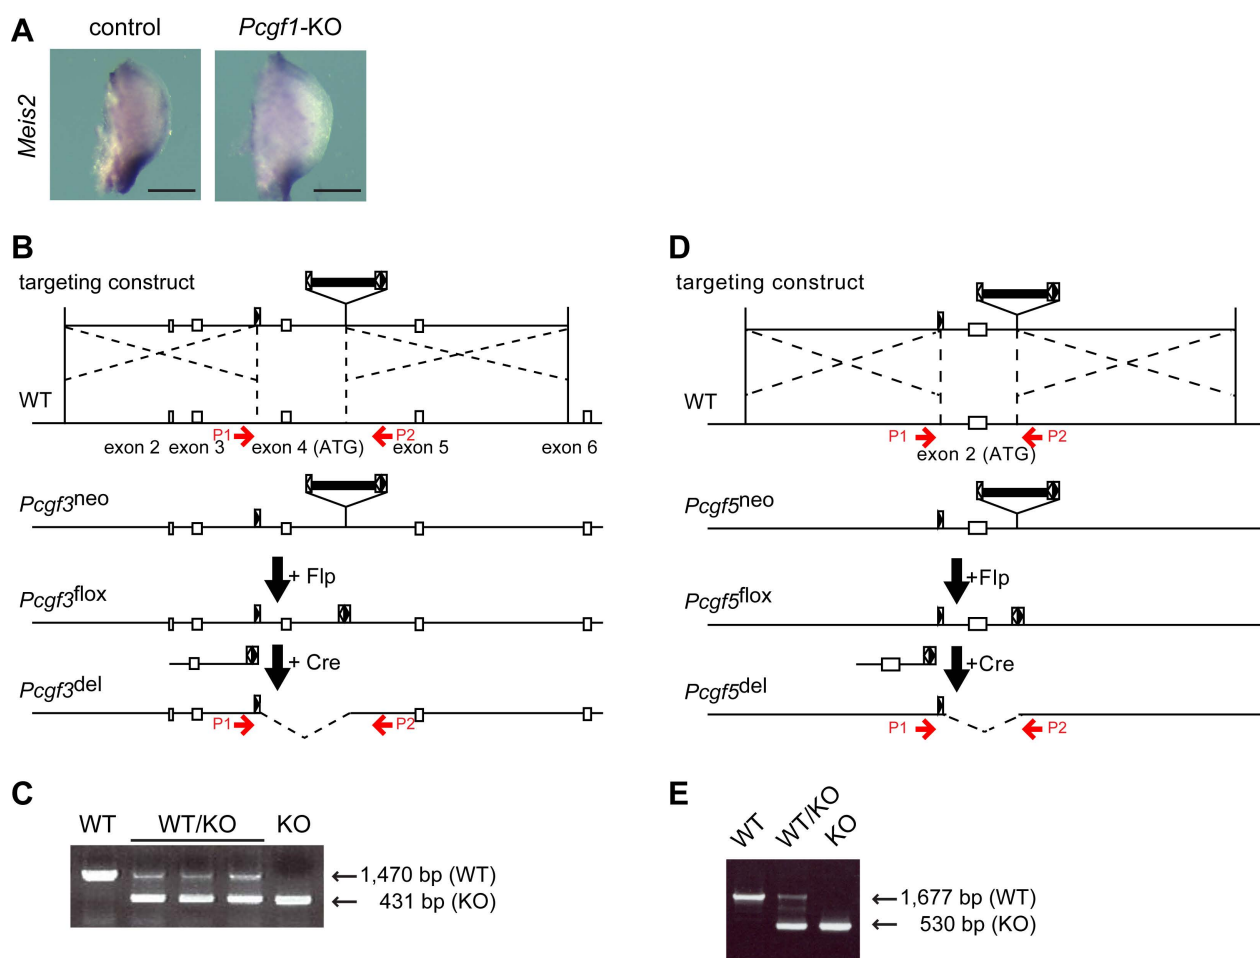

**Fig. S2 (related to Fig. 3). *Meis2* expression in *Pcgf1*-KO forelimb buds and Generation of *Pcgf3/5* mutants.** (A) *Meis2* expression in control (*Pcgf1*<sup>fl/fl</sup>) and *Pcgf1*-KO forelimb buds at E10.5. Scale bar, 250  $\mu$ m. (B) Schematic representation of gene targeting strategy to delete *Pcgf3*. Targeting construct to generate the *Pcgf3*<sup>neo</sup> allele harbors a Neomycin resistant gene cassette (indicated by bold bars), two loxP sites (indicated by closed triangles) and two FRT (open triangles) sites. The Neomycin resistant gene cassette was removed by mating *Pcgf3*<sup>neo/+</sup> with FLP deleter line (CAG-FLP) to generate the *Pcgf3*<sup>lox</sup> allele. The *Pcgf3*-KO allele was generated by deleting the 4<sup>th</sup> exon of *Pcgf3* by crossing mice carrying *Pcgf3*<sup>lox</sup> with CAG-Cre mouse strain. The *Pcgf3* mutant line was maintained as heterozygotes and KO mice were obtained by mating *Pcgf3*<sup>+/-</sup> female with *Pcgf3*<sup>+/-</sup> male. Genomic positions of PCR primers (P1 and

P2) used for genotyping are indicated by red arrows. (C) PCR analysis to distinguish the wild type (WT), *Pcgf3*<sup>+/-</sup> (WT/KO) and *Pcgf3*<sup>-/-</sup> (KO). (D) Schematic representation of gene targeting strategy to delete *Pcgf5*. Targeting construct to generate the *Pcgf5*<sup>neo</sup> allele harbors a Neomycin resistant gene cassette (indicated by bold bars), two loxP sites (indicated by closed triangles) and two FRT (open triangles) sites. The Neomycin resistant gene cassette was removed by mating *Pcgf5*<sup>neo/+</sup> with FLP deleter line (CAG-FLP) to generate the *Pcgf5*<sup>lox</sup> allele. The *Pcgf5*-KO allele was generated by deleting the 2nd exon of *Pcgf5* by crossing mice carrying *Pcgf5*<sup>lox</sup> with CAG-Cre mouse strain. The *Pcgf5* mutant line was maintained as heterozygotes and KO mice were obtained by mating *Pcgf5*<sup>+/-</sup> female with *Pcgf5*<sup>+/-</sup> male. Genomic positions of PCR primers (P1 and P2) used for genotyping are indicated by red arrows. (E) PCR analysis to distinguish the wild type (WT), *Pcgf5*<sup>+/-</sup> (WT/KO) and *Pcgf5*<sup>-/-</sup> (KO).
